# Supplementary material for: Identification of Gas Sand Horizons of the Rashidpur Structure, Surma Basin, Bangladesh, Using 2D Seismic Interpretation
Source: Hindawi journal article supplement (doi:10.1155/2015/840168), 2015-01-01
Supplement: f2 [file 840168.f2.pdf]

Appendix A:

Appendix A1: Figure

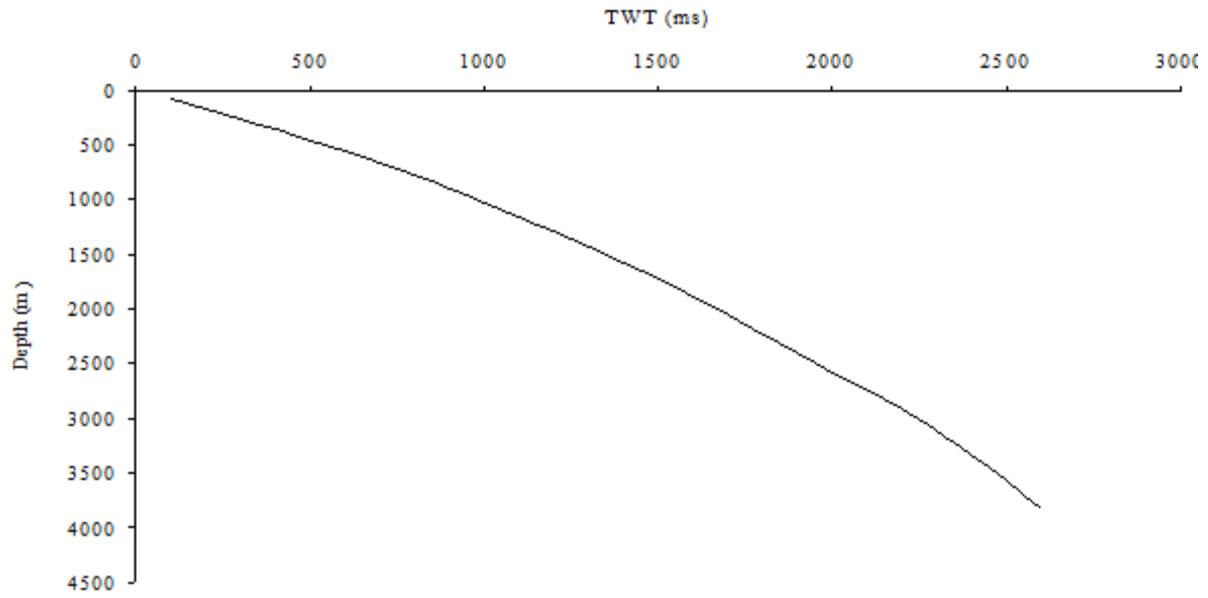

Figure 1. T-Z curve for the Rashidpur structure (After BOGMC, 1989)

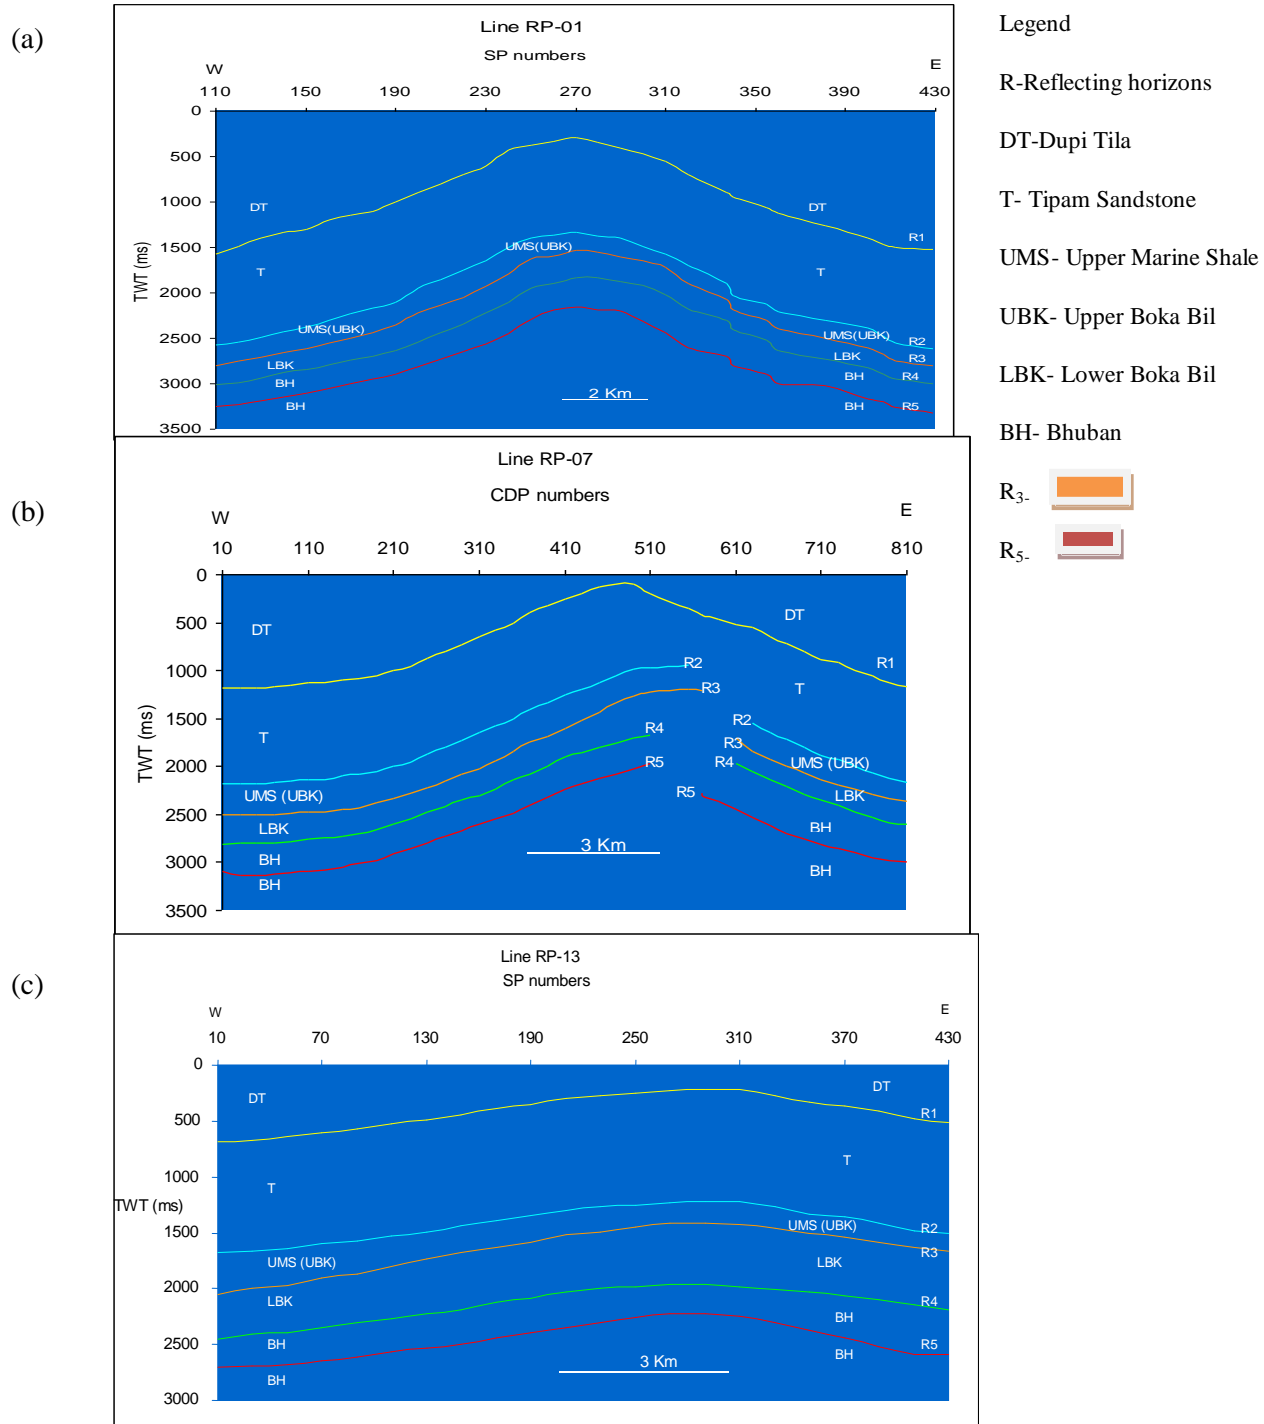

Figure 2 Geological interpretation of seismic sequences in terms of TWT (ms) along the seismic section of the line RP-01 (a), line RP-07 (b) and line RP-13 (c).

Appendix A2: Table

Table 1. Length, orientation, folds and type of seismic lines which are used for interpretation.

| Serial No. | Seismic Lines | Length (km) | Orientation | Fold | Type        |
|------------|---------------|-------------|-------------|------|-------------|
| 1          | RP -01        | 15.48       | E-W         | 24   | Dip Line    |
| 2          | RP -02        | 15.3        | E-W         | 24   | Dip Line    |
| 3          | RP -03        | 15          | E-W         | 24   | Dip Line    |
| 4          | RP -04        | 14          | E-W         | 24   | Dip Line    |
| 5          | RP -05        | 16.77       | E-W         | 24   | Dip Line    |
| 6          | RP -06        | 17.75       | E-W         | 24   | Dip Line    |
| 7          | RP -07        | 20.4        | E-W         | 24   | Dip Line    |
| 8          | RP -08        | 19.19       | E-W         | 24   | Dip Line    |
| 9          | RP -10        | 15.48       | E-W         | 24   | Dip Line    |
| 10         | RP -12        | 12.58       | E-W         | 24   | Dip Line    |
| 11         | RP -13        | 10.7        | E-W         | 24   | Dip Line    |
| 12         | RP -14(N)     | 25.93       | N-S         | 24   | Strike Line |
| 13         | RP- 14(S)     | 9           | N-S         | 24   | Strike Line |

Table 2. Spatial positions of the reflectors identified on the seismic sections of Rashidpur structure.

| Reflectors     | Formation involved          | Seismic boundary                    |
|----------------|-----------------------------|-------------------------------------|
| R <sub>5</sub> | Bhuban                      | Top of the Lower Gas Sand (LGS)     |
| R <sub>4</sub> | Boka Bil –Bhuban            | Top of the Bhuban                   |
| R <sub>3</sub> | Boka Bil                    | Top of the Upper Gas Sand (UGS)     |
| R <sub>2</sub> | Tipam Sandstone -Boka Bil   | Top of the Upper Marine Shale (UMS) |
| R <sub>1</sub> | Dupi Tila – Tipam Sandstone | Top of the Tipam Sandstone          |

Table 3. Show identified fault displacement magnitude of different reflectors.

| Reflectors | Fault Displacement |           |
|------------|--------------------|-----------|
|            | TWT (ms)           | Depth (m) |
| R5         | 310                | 430       |
| R4         | 230                | 390       |
| R3         | 450                | 600       |
| R2         | 400                | 530       |

Table 4. Well log data of the well 2 and seismic data of the Rashidpur structure.

| Formation | Depth (m) | Ave. Velocity (m/s) | TWT (sec)   |
|-----------|-----------|---------------------|-------------|
| Dupi Tila | 0-315     | 1730                | 0-0.364     |
| Tipam     | 315-1225  | 2348                | 0.364-1.042 |
| Boka Bil  | 1225-2473 | 3408                | 1.042-1.450 |
| Bhuban    | 2473-4146 | 4320                | 1.450-2.918 |

Table 5. Characteristics of sub-surface seismic interfaces in the Rashidpur structure (after Hossain, 2000).

| Depth range (m) | Thickness (m) | Velocity (m/sec) | Density (kg/m <sup>3</sup> ) | RC     | TC    | Reflectors |
|-----------------|---------------|------------------|------------------------------|--------|-------|------------|
| 0-186           | 186           | 1650             | 1975                         | 0.054  | 0.946 | R 1        |
| 186-274         | 88            | 1800             | 2019                         | 0.017  | 0.983 |            |
| 274-384         | 110           | 1850             | 2033                         | 0.036  | 0.964 |            |
| 384-466         | 82            | 1960             | 2063                         | 0.065  | 0.935 |            |
| 466-603         | 137           | 2175             | 2117                         | 0.03   | 0.97  |            |
| 603-811         | 208           | 2285             | 2143                         | 0.046  | 0.954 |            |
| 811-1244        | 433           | 2460             | 2183                         | 0.055  | 0.945 |            |
| 1244-1332       | 88            | 2685             | 2231                         | -0.157 | 1.157 | R 2        |
| 1332-1370       | 38            | 2085             | 2095                         | 0.129  | 0.871 |            |
| 1370-1420       | 50            | 2565             | 2206                         | -0.057 | 1.057 |            |
| 1420-1480       | 60            | 2340             | 2156                         | 0.127  | 0.873 | R 3        |
| 1480-1535       | 55            | 2870             | 2269                         | 0.014  | 0.986 |            |
| 1535-1726       | 191           | 2935             | 2282                         | 0.014  | 0.986 | R 4        |
| 1726-1920       | 194           | 3000             | 2294                         | 0.04   | 0.96  |            |
| 1920-2000       | 80            | 3200             | 2332                         | -0.025 | 1.025 | R 5        |
| 2000-2082       | 82            | 3075             | 2308                         | 0.043  | 0.957 |            |
| 2082-2208       | 126           | 3295             | 2349                         | 0.090  | 0.91  |            |
| 2208-2240       | 32            | 3805             | 2435                         | -0.067 | 1.067 | R 5        |
| 2240-2410       | 170           | 3415             | 2370                         | 0.021  | 0.979 |            |
| 2410-2630       | 220           | 3535             | 2390                         | 0.023  | 0.977 |            |
| 2630-2700       | 70            | 3665             | 2414                         | -0.085 | 1.085 |            |
| 2700-2730       | 30            | 3200             | 2332                         | 0.094  | 0.906 |            |
| 2730-2926       | 196           | 3720             | 2421                         | 0.036  | 0.964 |            |
| 2926-3115       | 189           | 3945             | 2456                         | -0.055 | 1.055 |            |
| 3115-3150       | 35            | 3610             | 2403                         | 0.047  | 0.953 |            |
| 3150-3435       | 285           | 3890             | 2448                         | 0.051  | 0.949 |            |
| 3435-3627       | 192           | 4220             | 2498                         | -0.038 | 1.038 |            |
| 3627-3770       | 143           | 3970             | 2460                         | 0.048  | 0.952 |            |
| 3770-3847       | 77            | 4285             | 2508                         | 0.012  | 0.988 |            |
| 3847-3918       | 71            | 4370             | 2520                         | -0.046 | 1.046 |            |
| 3918-4000       | 82            | 4055             | 2474                         | 0.029  | 0.971 |            |
| 4000-4055       | 55            | 4250             | 2503                         | -0.016 | 1.016 |            |
| 4055-4125       | 70            | 4140             | 2487                         | -0.091 | 1.091 |            |
| 4125            |               | 3575             | 2397                         |        |       |            |
