# Supplementary figures and images for: Identification of Gas Sand Horizons of the Rashidpur Structure, Surma Basin, Bangladesh, Using 2D Seismic Interpretation
Source: Hindawi journal article supplement (doi:10.1155/2015/840168), 2015-01-01

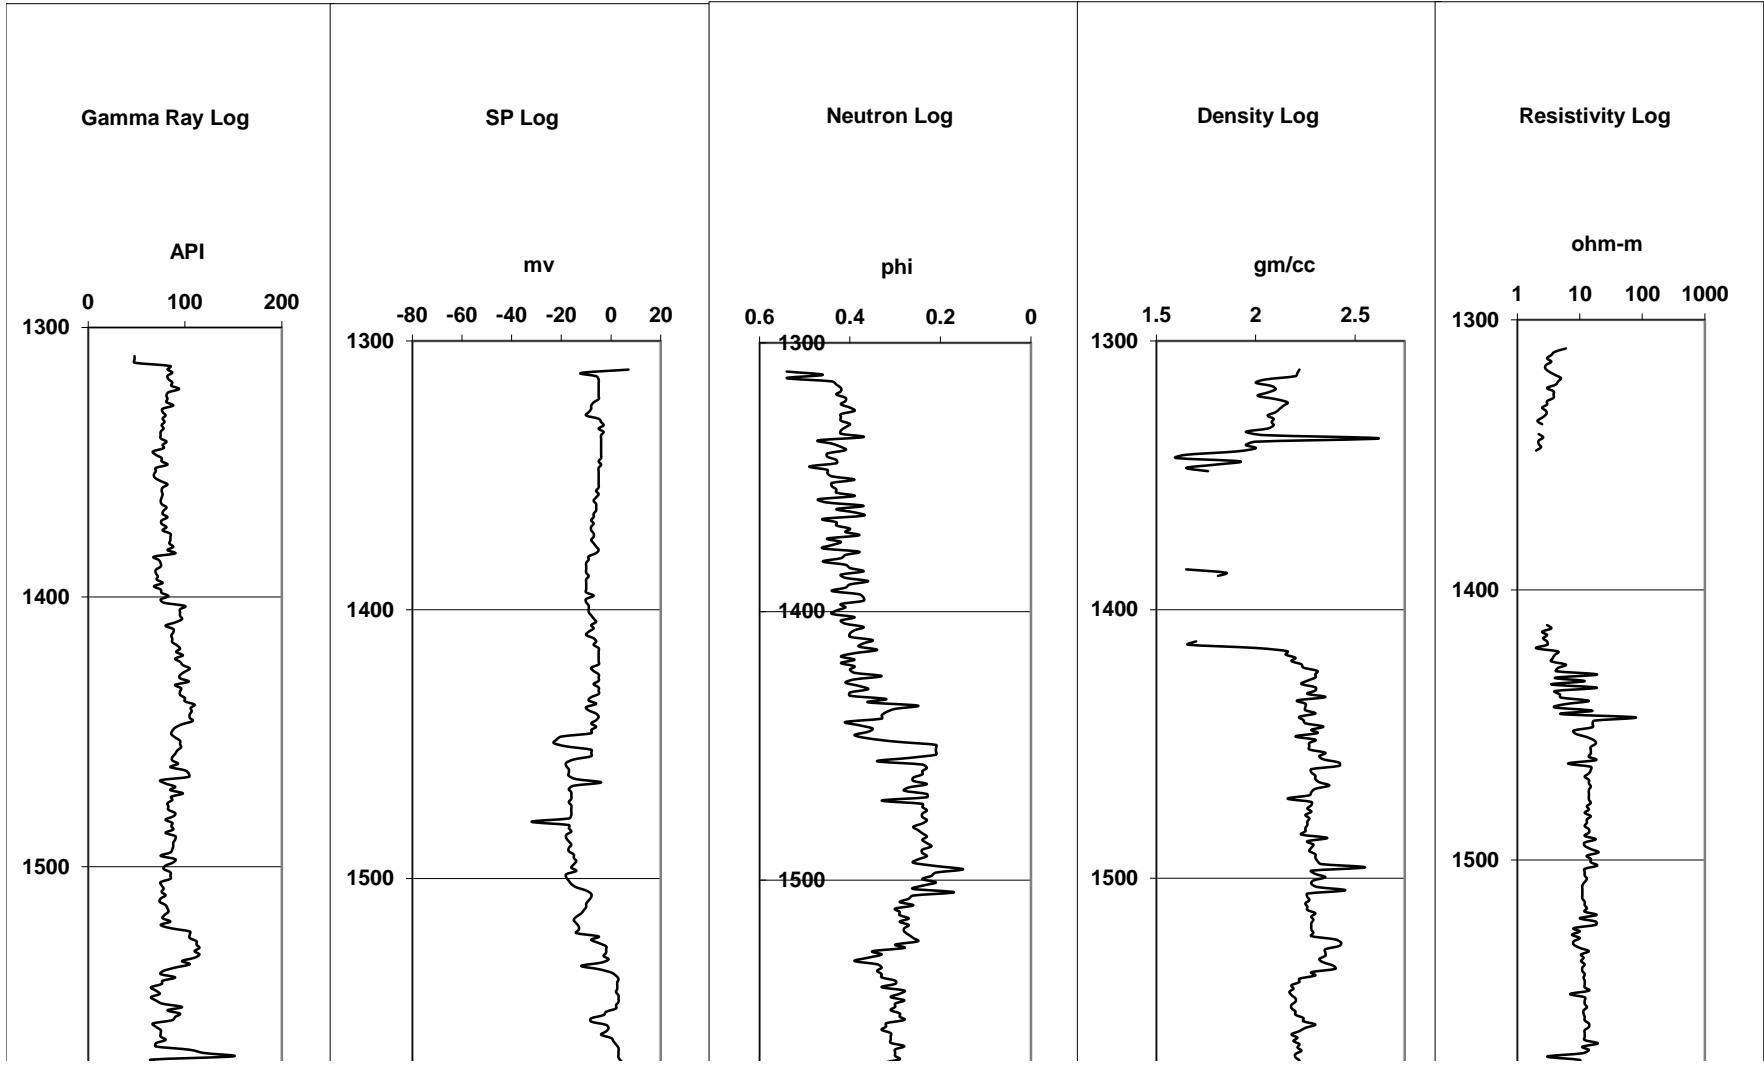

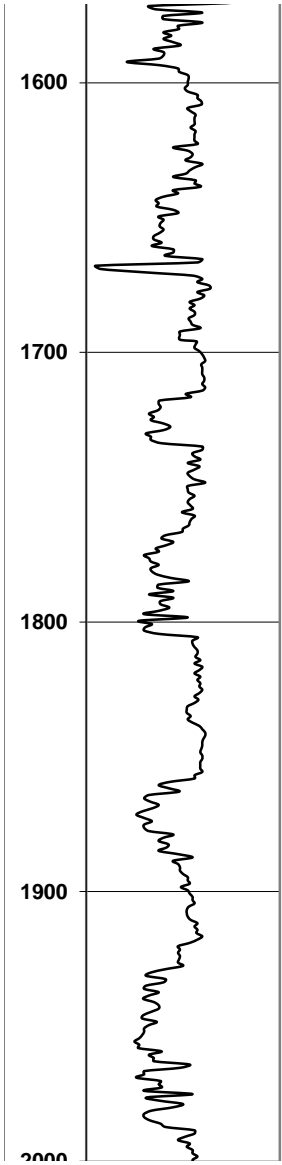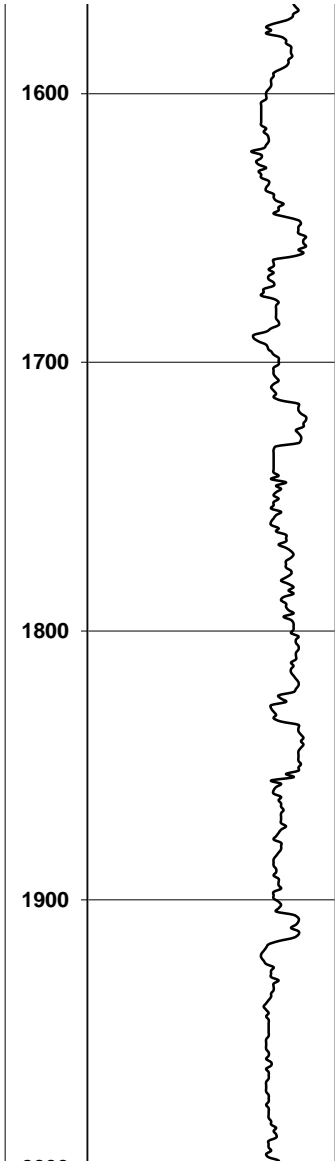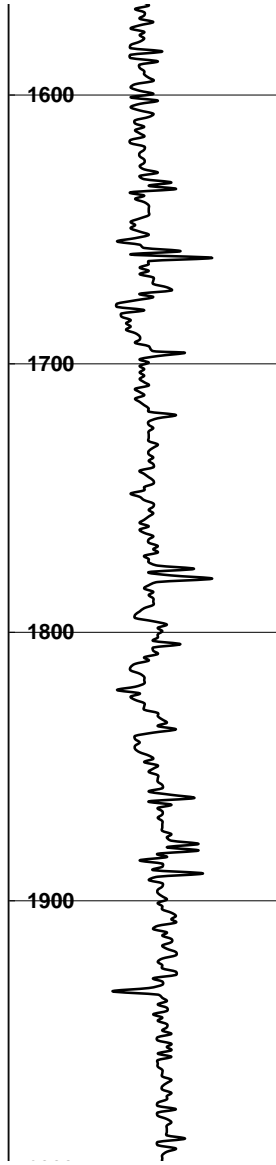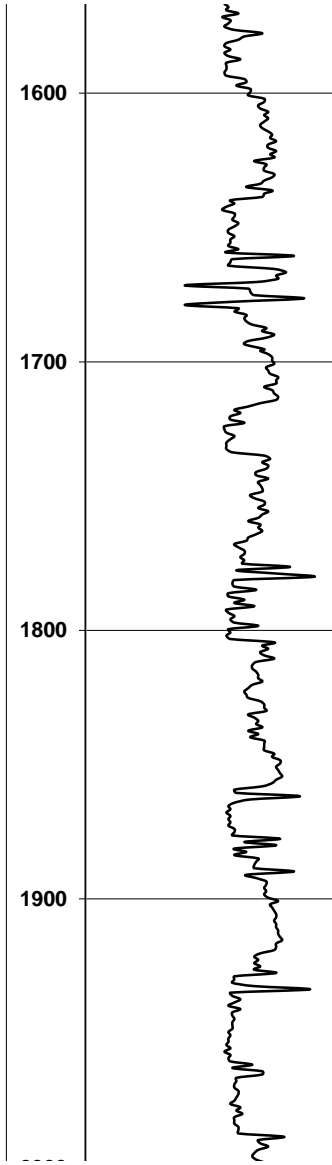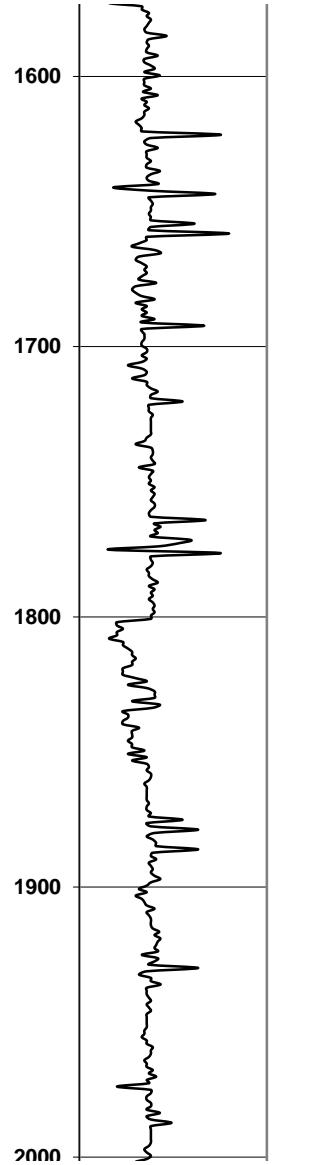

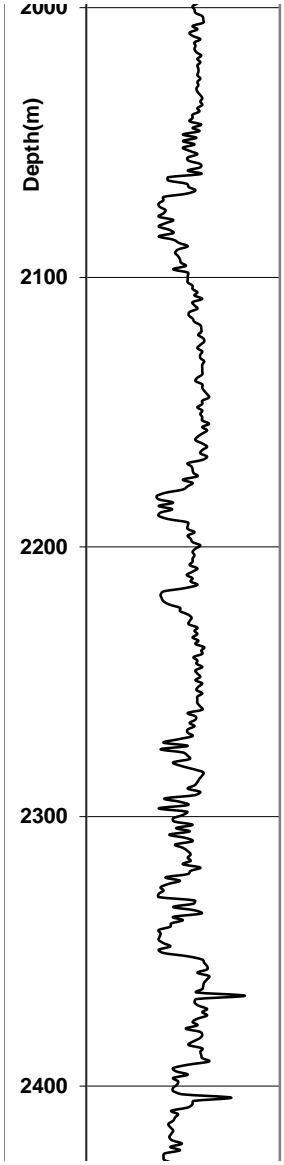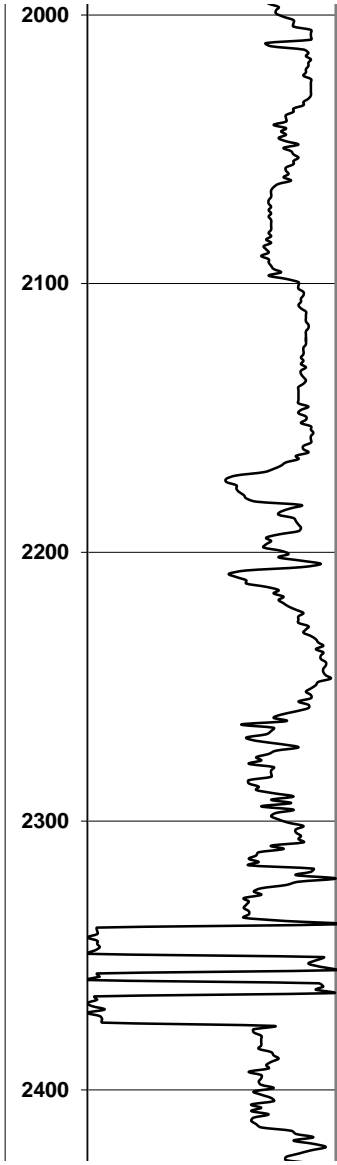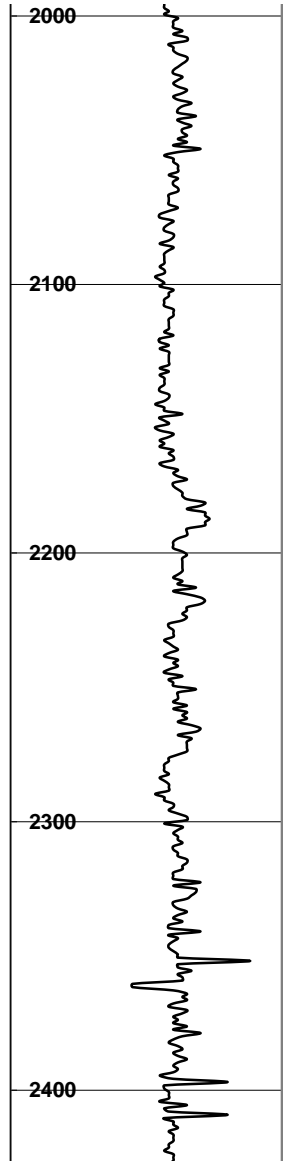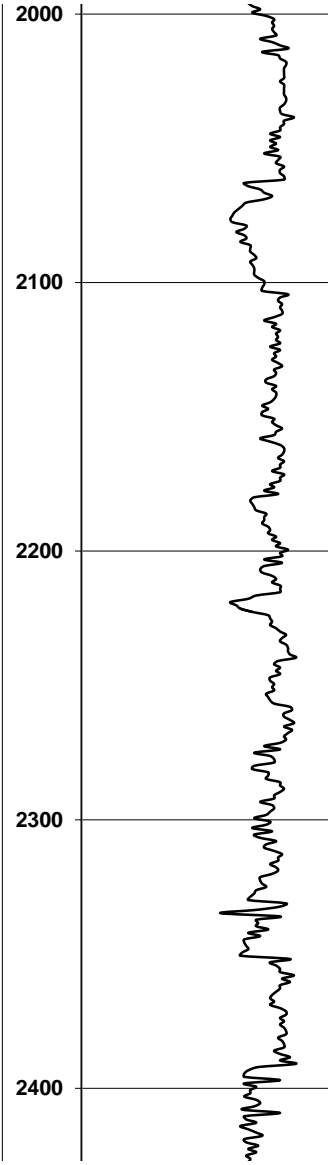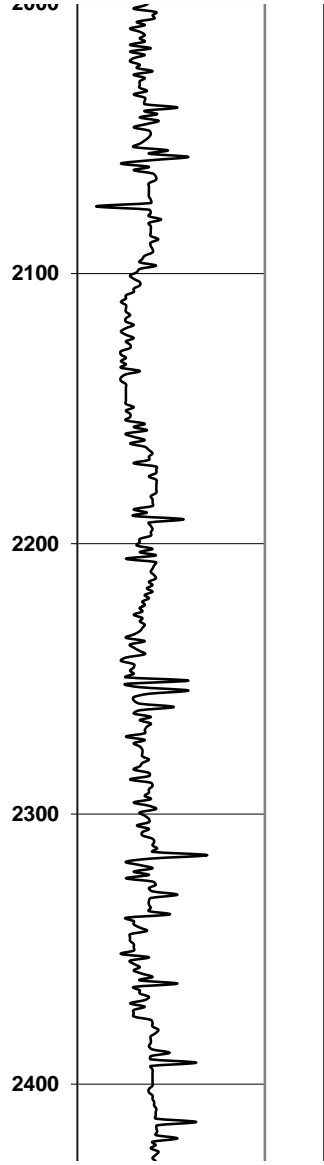

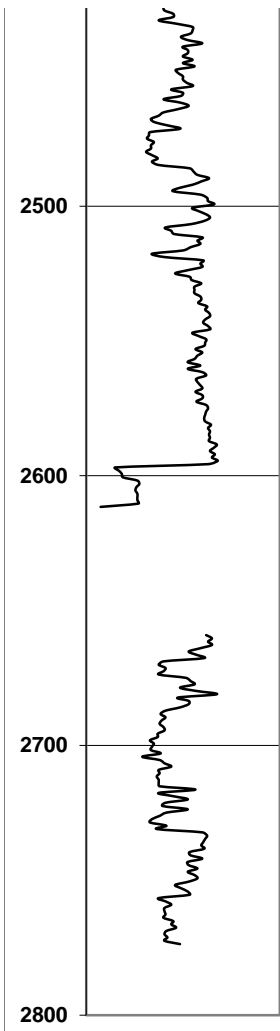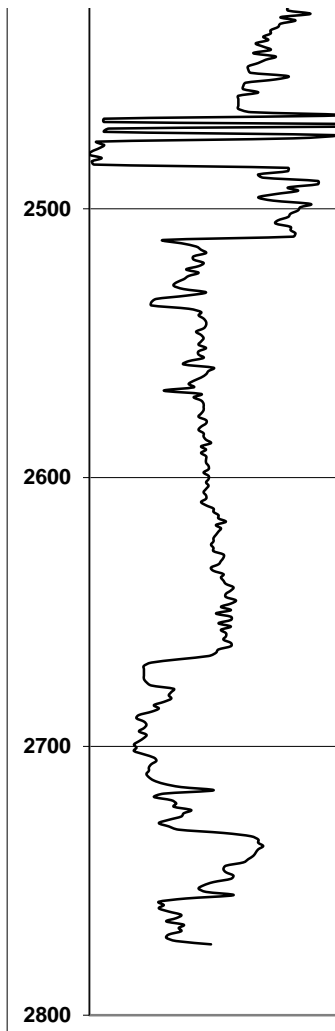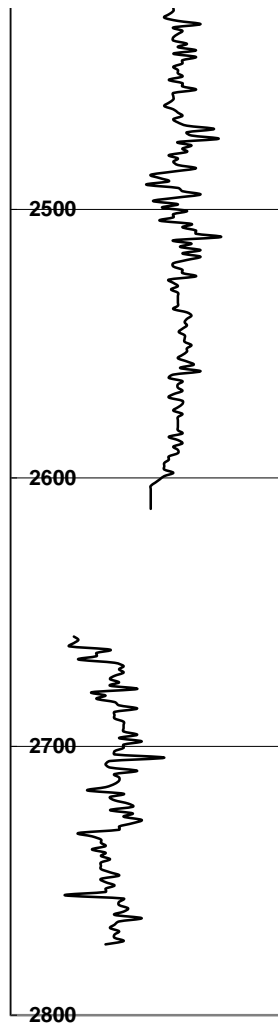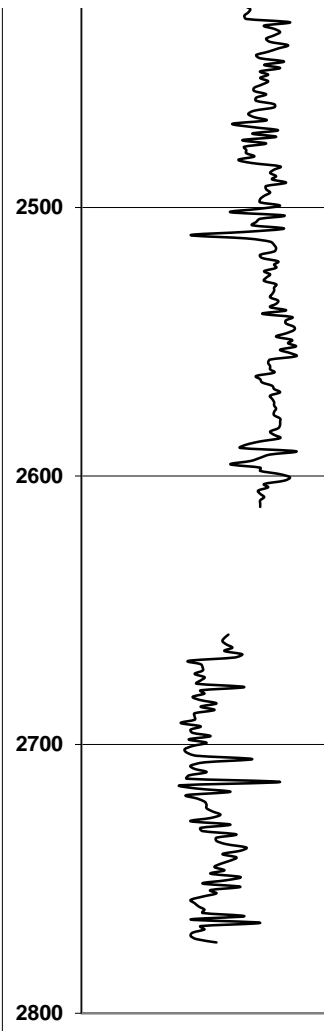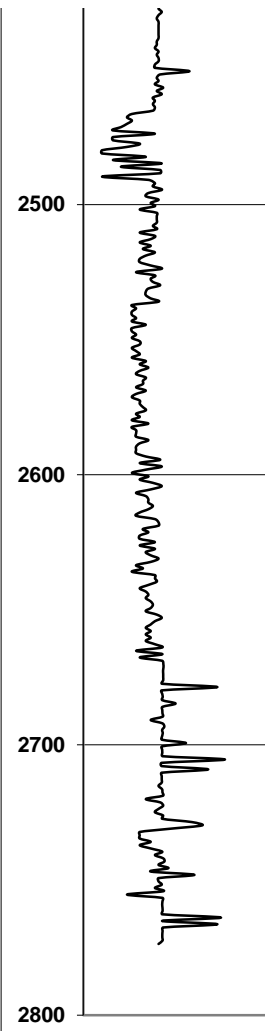

Supplement: f1 [file 840168.f1.pdf]
